# Supplementary material for: Diffusion Model Based Spectral Clustering for Protein-Protein Interaction Networks
Source: PubMed Central journal article supplement (PMC2935381; doi:10.1371/journal.pone.0012623), 2010-09-07
Supplement: pone.0012623.s002.pdf [file pone.0012623.s002.pdf]

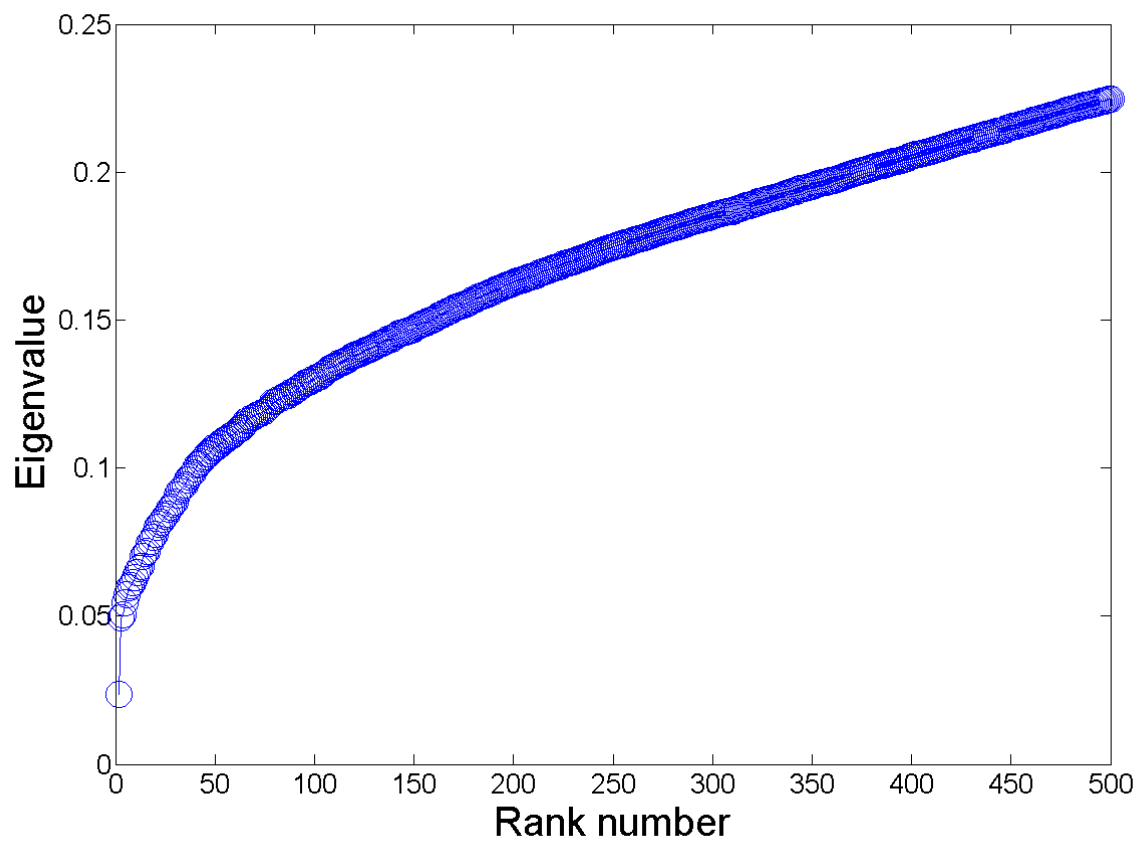

**Figure S2 Changes in eigenvalues with respect to cluster number in the yeast PPI network**

The eigenvalues for the diffusion matrix are sorted in the ascending order. There is no great gap between the neighboring eigenvalues.
