# Supplementary material for: Diffusion Model Based Spectral Clustering for Protein-Protein Interaction Networks
Source: PubMed Central journal article supplement (PMC2935381; doi:10.1371/journal.pone.0012623), 2010-09-07
Supplement: pone.0012623.s004.pdf [file pone.0012623.s004.pdf]

**Table S1 Relation to spectral analysis**

Generally, the Laplacian matrix of a graph network is defined as:

$$\mathbf{L} = \mathbf{\Delta} - \mathbf{A} \quad (\text{S1})$$

where  $\mathbf{A}$  is the adjacency matrix.  $\mathbf{\Delta}$  is given by:

$$\Delta_{ij} = \delta_{ij} \sum_{k=1}^n A_{ik} \quad \delta_{ij} = \begin{cases} 1 & \text{if } i = j \\ 0 & \text{if } i \neq j \end{cases} \quad (\text{S2})$$

When use of the transition matrix of a random walk  $\mathbf{D}^{-1}\mathbf{A}$  is favored, the Laplacian matrix is changed into:

$$\mathbf{L}^* = \mathbf{\Delta}^* - \mathbf{D}^{-1}\mathbf{A} \quad (\text{S3})$$

$$\Delta^*_{ij} = \delta_{ij} \sum_{k=1}^n (\mathbf{D}^{-1}\mathbf{A})_{ik} \quad (\text{S4})$$

$$\delta_{ij} = \begin{cases} 1 & \text{if } i = j \\ 0 & \text{if } i \neq j \end{cases}$$

Here, the set of all the eigenvalues  $\lambda$  and the corresponding eigenvectors  $\mathbf{v}$  for  $\mathbf{L}^*$ , called spectrum, is given by:

$$\mathbf{L}^* \cdot \mathbf{v}_i = \lambda \cdot \mathbf{v}_i \quad (\text{S5})$$

where  $\{\mathbf{v}_i\}$  provides the node coordinates in the Euclidean space to perform network clustering. Since ADMSC corresponds to the spectral clustering that employs a modified transition matrix  $\mathbf{D}^{-\beta}\mathbf{A}$ , it can be regarded as the diffusion model-based probabilistic interpretation of spectral analysis.
