# Supplementary material for: Diffusion Model Based Spectral Clustering for Protein-Protein Interaction Networks
Source: PubMed Central journal article supplement (PMC2935381; doi:10.1371/journal.pone.0012623), 2010-09-07
Supplement: pone.0012623.s005.pdf [file pone.0012623.s005.pdf]

## Table S2 Instruction of ADMSC program in Matlab

README.txt in ADMSC.zip

Execute the ADMSC.m file in MATLAB

```
>>ADMSC
```

Input for ADMSC.m

```
line 46: nc=33; % Number of clusters
```

```
line 47: B=1.4; % Beta factor
```

\*You decide the number of clusters and the value of the beta factor.

```
line 52 : [nodea nodeb] = textread('Scere.txt','%s%s'); % input your network
```

\*The file of default is the yeast PPI network that consists of the binary relation between proteins.

```
line 97 : outputdata(nodes,cidx,modu,cv,nnode,nedge); % output data
```

\*The result is output as 'output.txt'.
